# Supplementary material
Source: HighWire-hosted journal article supplement (https://rmdopen.bmj.com/content/8/1/e002160)
Supplement: inline-supplementary-material-1 [file inline-supplementary-material-1.pdf]

## APPENDIX

**In addition to the authors, the following investigators and FVSG members participated in the study (all in France):** Badih Ayach, Néphrologie, Centre Hospitalier (CH) Charleville-Mézières; Bernard Imbert, Médecine Interne, CH Universitaire (CHU) Grenoble; Bruno Graffin, Médecine Interne, Polyclinique Mutualiste, Ollioules; Bruno Legallicier, Néphrologie, CHU Rouen; Carine Achard-Hottelart, Néphrologie, CHU Limoges; Catherine Hanrotel-Saliou, Néphrologie, CHU Brest; Charles Leské, Rhumatologie, CH Cholet; Christophe Charasse, Néphrologie, CH Saint-Brieuc; Claire Le Hello, Médecine Vasculaire, CHU Caen; Dominique Merrien, Médecine Interne, CH Compiègne; Elisa Pasqualoni, Médecine Interne, CH Saint-Denis; Elisabeth Diot, Médecine Interne, CHU Tours; Frédéric Grassin, Pneumologie, Hôpital d'Instruction des Armées, Brest; Gilles Jebrak, Pneumologie, CHU Bichat, Paris; Guillaume Gondran, Médecine Interne, CHU Limoges; Hélène Desmurs-Clavel, Médecine Interne, CHU Lyon; Holly Bezanahary, Médecine Interne, CHU Limoges; Isabelle de Lacroix-Szmania, CH Intercommunal, Créteil; Jean-Jacques Dion, Néphrologie, CH Charleville-Mézières; Nicolas Limal, Médecine Interne, CHU Créteil; Olivier Decaux, Hématologie Clinique, CHU Sud, Rennes; Stéphane Vinzio, Médecine Interne, Groupe Hospitalier Mutualiste, Grenoble; Sylvain Lanot, Rhumatologie, CH Alençon; Thierry Colin, Rhumatologie, CH Cherbourg; Xavier Delbrel, Médecine Polyvalente, CH Pau; Yann Ollivier, Médecine Interne, CHU Caen; Yoann Crabol, Médecine Interne, Hôpital Cochin, Paris; Jean-Jacques Boffa, Néphrologie, Hôpital Tenon, Paris; Bertrand Godeau, Médecine Interne, CHU Henri-Mondor, Créteil; Boris Bienvenu, Médecine Interne, CHU Caen; Claire Le Jeunne, Médecine Interne, Hôpital Cochin, Paris; Éric Thervet, Néphrologie, HEGP, Paris; Isabelle Marie, Médecine Interne, CHU Lyon; Jérôme Rossert, Néphrologie, Hôpital Tenon, Paris; Marc Michel, Médecine Interne, CHU Henri-Mondor, Créteil; Véronique Loustaud-Ratti, Médecine Interne, CHU Limoges; Vincent Cottin, Centre national de référence de maladies pulmonaires rares de l'adulte, CHU Louis Pradel, Lyon.
